# Supplementary material for: Differential immune profiles distinguish the mutational subtypes of gastrointestinal stromal tumor
Source: JCI journal article supplement (doi:10.1172/jci124108), 2019-02-14
Supplement: sd1 [file 1]

### **Supplemental Figure 1.**

(A) Principal component analysis (PCA) of all GIST specimens (top) and only *KIT*, *PDGFRA*, and *SDH*-deficient specimens (bottom) as calculated by DESeq2 for R (n=75, clinicopathologic characteristics are available in Supplemental Table 1).

### **Supplemental Figure 2.**

(A) (top) ESTIMATE and (bottom) Cyt scores by mitotic rate (left) and tumor sizes (middle and right) in all *KIT* and *PDGFRA*-mutant GISTs (n=61). (B) (top) ESTIMATE and (bottom) Cyt scores by mitotic rate (left) and tumor sizes (middle and right) in UPG *KIT* and *PDGFRA*-mutant GISTs (n=22). (C) ESTIMATE scores by mitotic rate in (left) UPG *KIT* and (right) UPG *PDGFRA*-mutant GISTs. High mitotic rate =  $\geq 5$  mitoses/hpf. Low mitotic rate =  $< 5$  mitoses/hpf. UPG = untreated, primary, gastric. \*p<0.05, t-test. Bars, median.

### **Supplemental Figure 3.**

(A) Demonstration of overfitting. On the left, using all 117 immune features to develop the random forest model on the All *KIT* vs. All *PDGFRA* training set (n=50) results in a 72.7% accuracy (red font) on the testing set (n=11). Decreasing the number of features included to 10, 8, and 6 results in an improvement in model accuracy on the testing set to 72.7%, 81.8%, and 90.9% respectively. (B) Retrained All *KIT* vs. All *PDGFRA* model with the top 6 features identified in Figure 6A excluded. (Left) Random forest modeling with 5-fold cross-validation of *KIT* and *PDGFRA*-mutant GIST specimens was performed. Training set created by partitioning 80% (n=50) of *KIT* and *PDGFRA* samples from Supplemental Table 3. Confusion matrix (middle) indicates assessment of model fit to training set. (Left) Predictive capacity of model on remaining *KIT* and *PDGFRA*-mutant GIST testing set (n=11), showing decreased classifier performance to 72.7% (red). Accuracy, sensitivity, specificity, and p-value [Acc > No Information Rate] of models are shown, as calculated by caret package for R.

### **Supplemental Figure 4.**

(A) ESTIMATE and Cyt scores in *PDGFRA*-mutant GIST samples that were correctly classified as *PDGFRA*-mutant (n=14) and incorrectly classified as *KIT*-mutant (n=6) by our All *KIT* vs. All *PDGFRA*-mutant random forest model (Figure 6A-C). (B) Distribution of top 6 features identified by random forest modeling in *KIT*-mutant tumors correctly classified as *KIT* and incorrectly classified as *PDGFRA* by our All *KIT* and All *PDGFRA*-mutant random forest model.

**Supplemental Figure 5.**

Western blot showing PD-L1 protein expression correlates with PD-L1 mRNA expression calculated by DESeq2. Human GIST numbers and mutation status are shown. KIT = *KIT*-mutant, SDHD = *SDH*-deficient.

Supplemental Figure 1

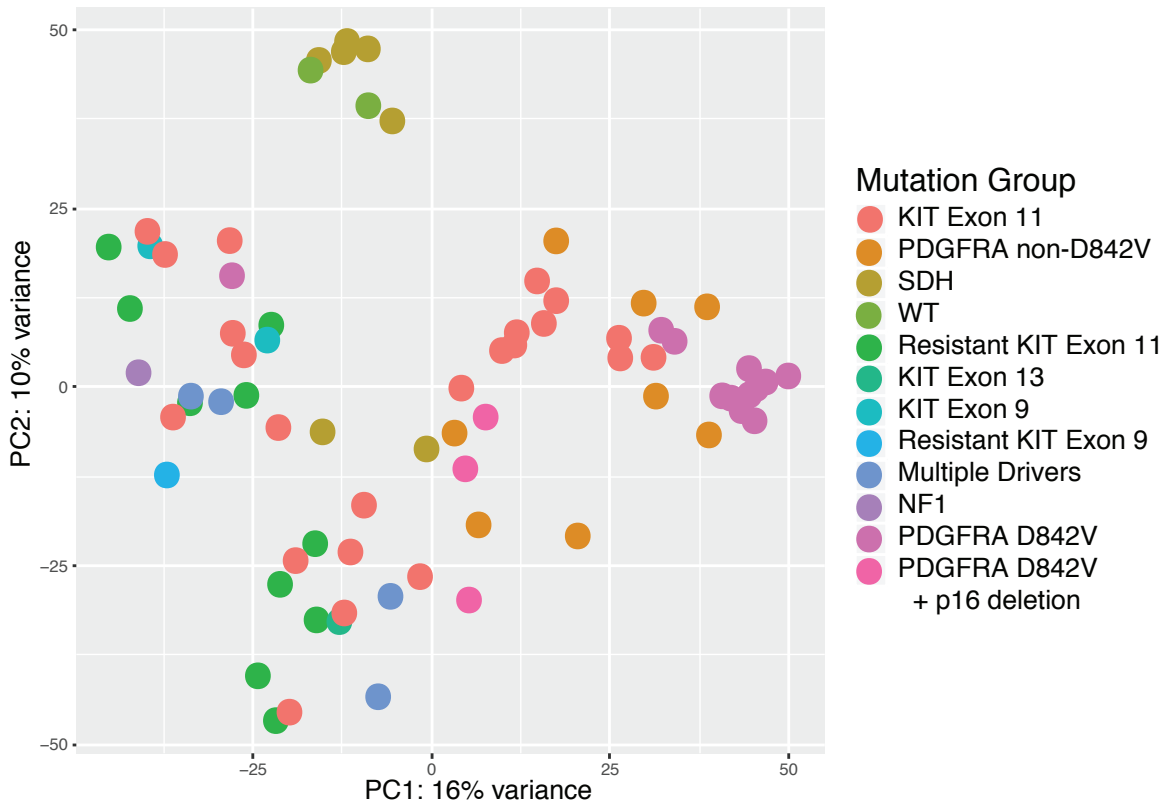

Only KIT, PDGFRA, and SDH shown for clarity

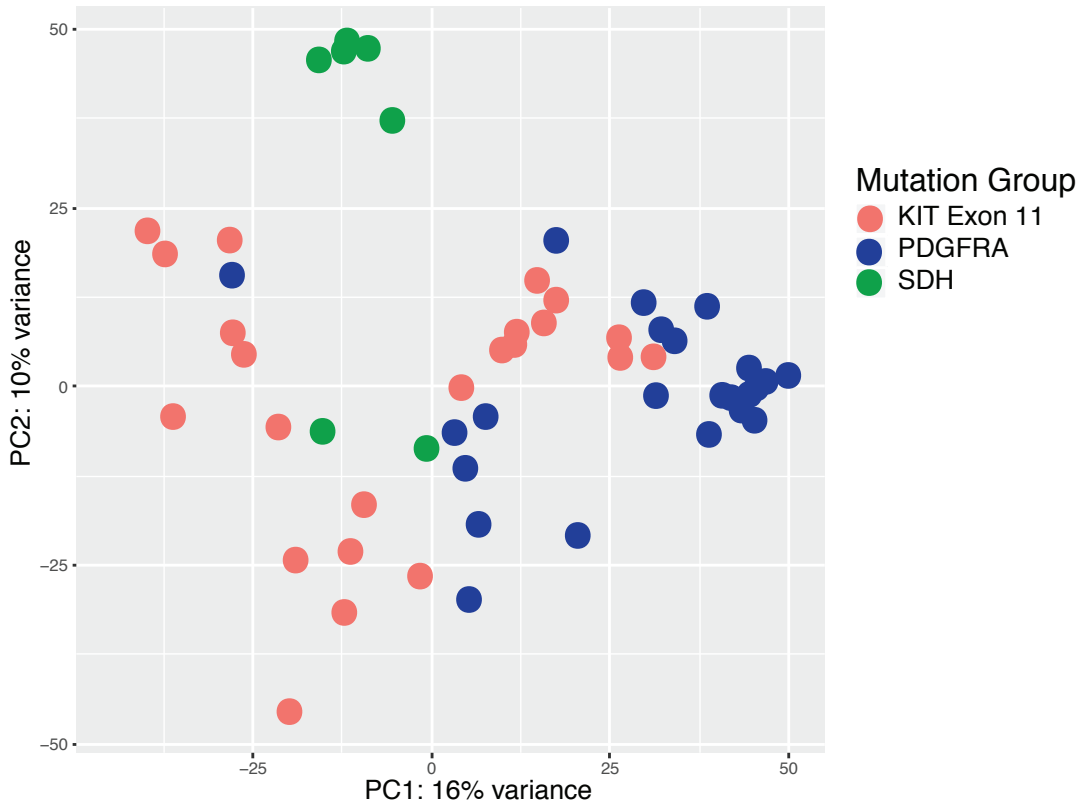

## Supplemental Figure 2

### A ALL KIT and PDGFRA-Mutant GISTs (n=61)

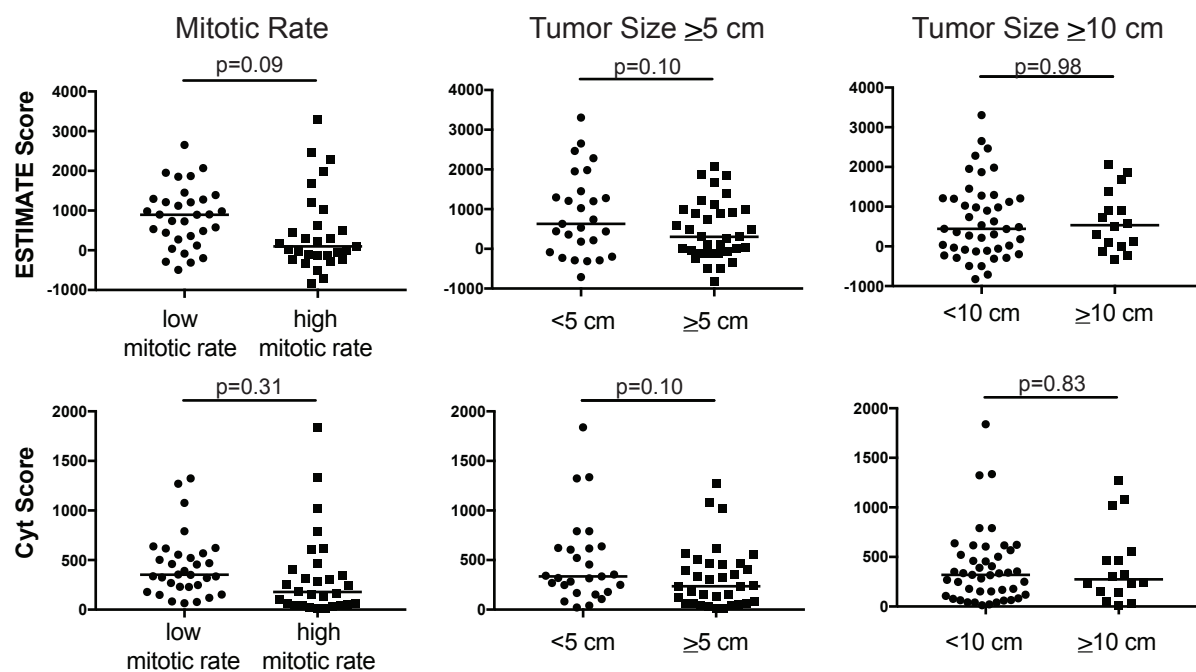

### B UPG KIT and PDGFRA-Mutant GISTs (n=22)

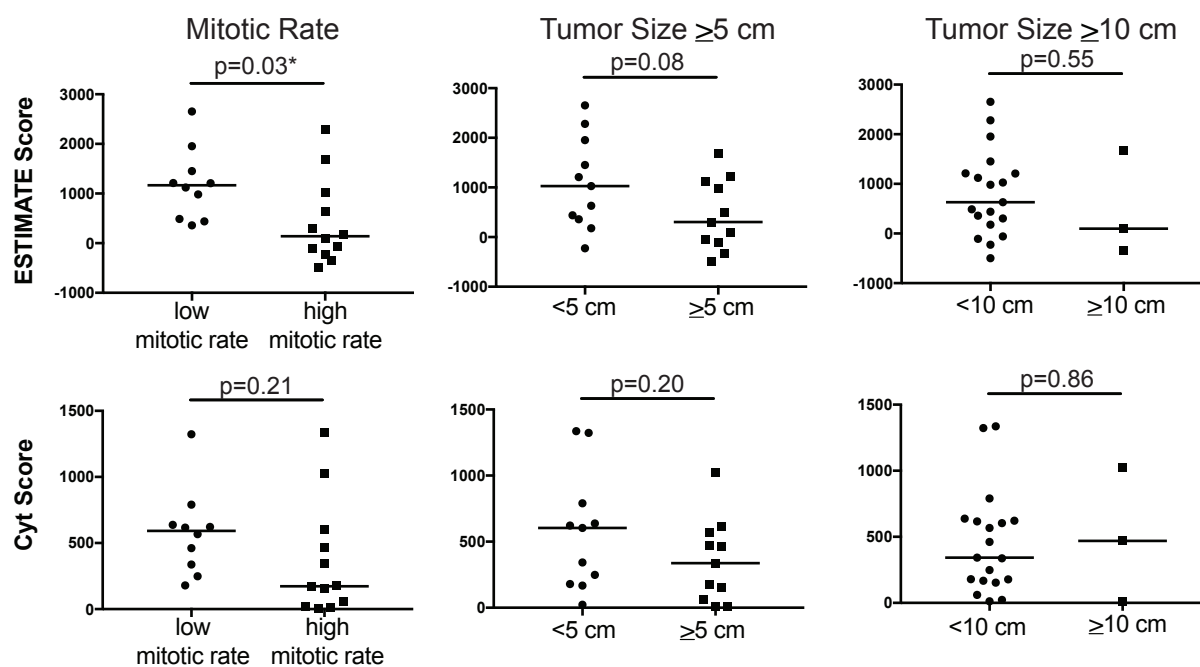

### C UPG KIT GISTs UPG PDGFRA GISTs

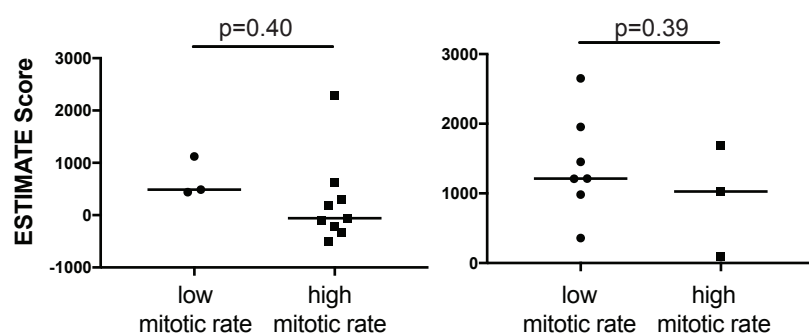

A

## 6 Feature Model

|           |            | Testing Set |   |
|-----------|------------|-------------|---|
|           |            | Actual      |   |
| Predicted | ALL KIT    | 6           | 0 |
|           | ALL PDGFRA | 1           | 4 |

Accuracy: 90.9%  
95% CI: [58.7-99.8]  
NIR = 63.6%  
p-value [Acc > NIR]: 0.05  
Sensitivity: 100%  
Specificity: 85.7%

## B

## Predictive Capacity

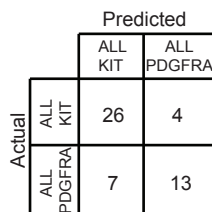

OOB Estimate of Error: 22%

|           |            | Testing Set |            |
|-----------|------------|-------------|------------|
|           |            | ALL KIT     | ALL PDGFRA |
| Predicted | ALL KIT    | 6           | 2          |
|           | ALL PDGFRA | 1           | 2          |

Accuracy: 72.7%  
95% CI: [39.0-94.0]  
NIR = 63.6%  
p-value [Acc > NIR] : 0.39  
Sensitivity: 50%  
Specificity: 85.7%

# Supplemental Figure 4

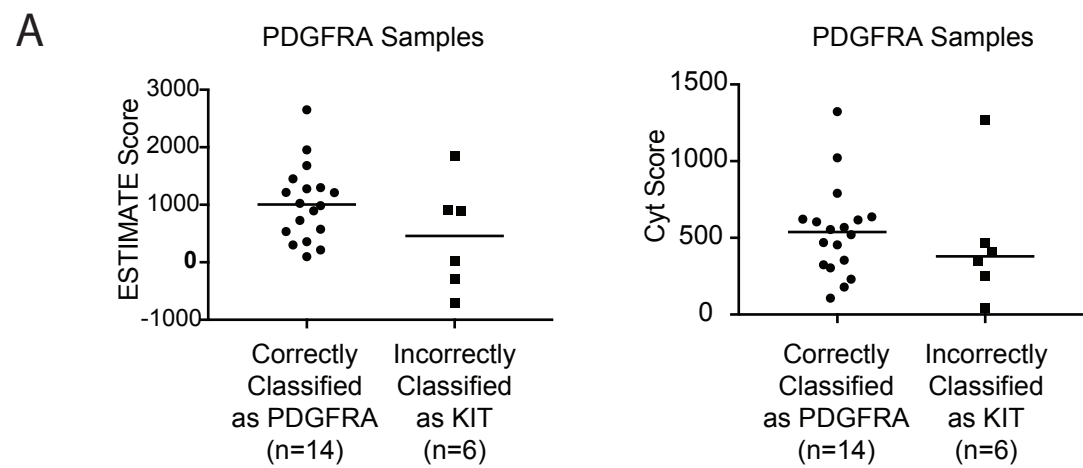

**B**

Distribution of Important Features Among KIT-mutant Tumors

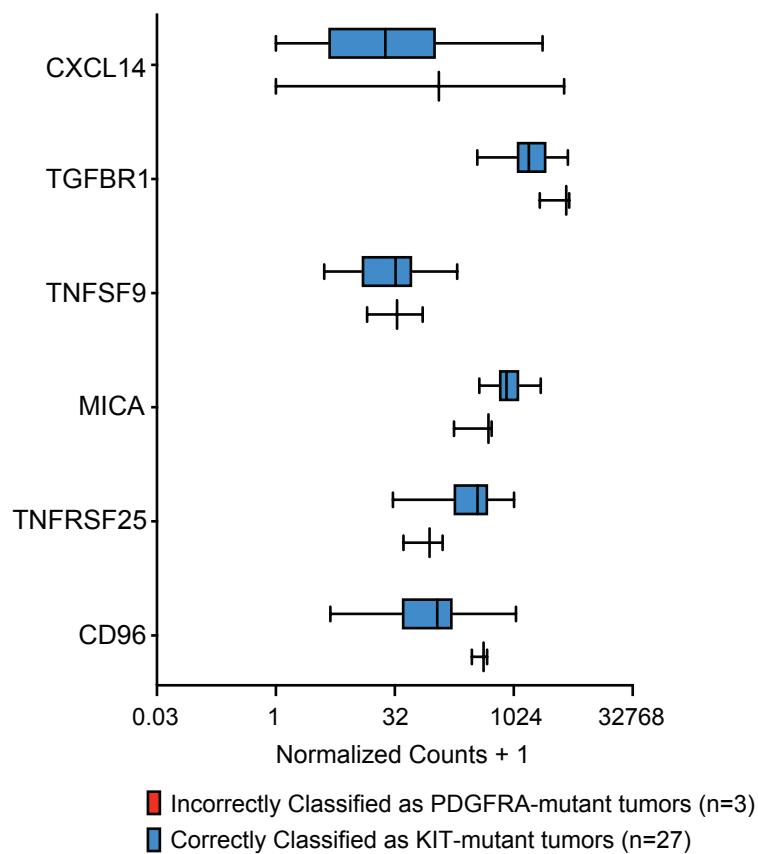

Supplemental Figure 5

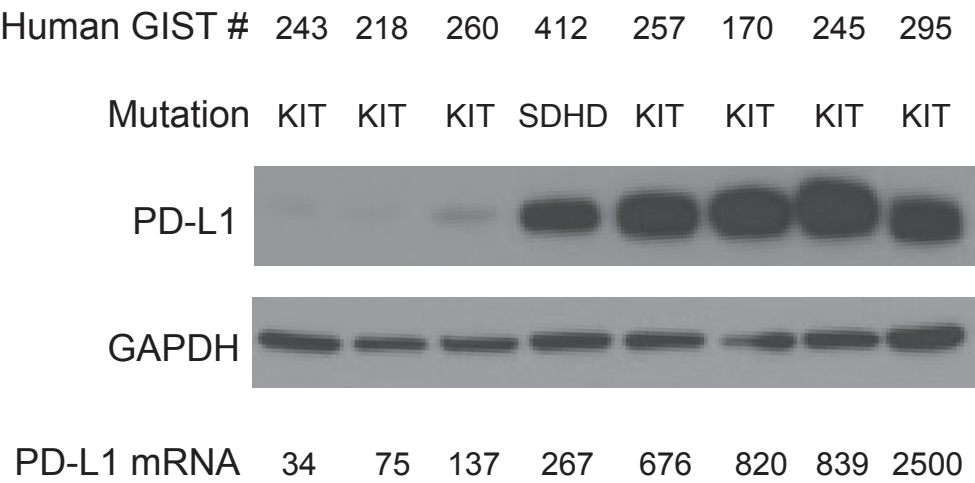

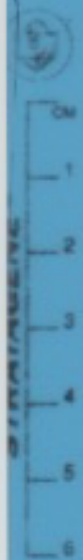

30<sup>th</sup>  
D-R

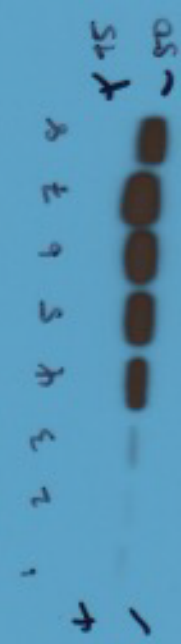

- |          |      |
|----------|------|
| 1. H6243 | 34   |
| 2. H6248 | 75   |
| 3. H6260 | 137  |
| 4. H6412 | 267  |
| 5. H6487 | 676  |
| 6. H6170 | 820  |
| 7. H6285 | 839  |
| 8. H6245 | 2510 |

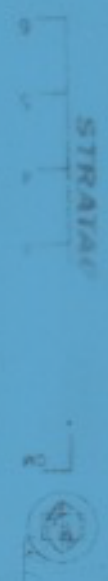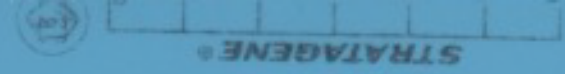

1<sup>st</sup>  
pxo

GAPDH

25  
+

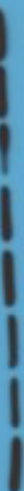

+
